# Supplementary material for: One-Pot Synthesized Nickel-Cobalt Sulfide-Decorated Graphene Quantum Dot Composite for Simultaneous Electrochemical Determination of Antiretroviral Drugs: Lamivudine and Tenofovir Disoproxil Fumarate
Source: Hindawi journal article supplement (doi:10.1155/2020/3124102), 2020-07-02
Supplement: f1 [file 3124102.f1.docx]

ELECTRONIC SUPPLEMENTARY MATERIAL

**One-pot synthesized nickel-cobalt sulfide decorated graphene quantum dots composite for simultaneous electrochemical determination of antiretroviral drugs, lamivudine and tenofovir disoproxil fumarate**

**Ruvimbo Chihava**, **Daniel Apath, Mambo Moyo**∗ ([0000-0003-4845-3028](https://www.scopus.com/redirect.uri?url=http://www.orcid.org/0000-0003-4845-3028&authorId=21741201300&origin=AuthorProfile&orcId=0000-0003-4845-3028&category=orcidLink))**, Munyaradzi Shumba, Vitalis Chitsa, Piwai Tshuma**

Sensor Lab Research Group, Department of Chemical Technology, Midlands State University, Private Bag 9055, Senga, Gweru, Zimbabwe

∗ Corresponding author: Tel.: +263 712 500 488. E-mail address: [moyom@staff.msu.ac.zw](mailto:moyom@staff.msu.ac.zw)

The behaviour of modified electrodes was also investigated using cyclic voltammetry at a scan rate of 100 mV/s (Fig S1). Redox peaks were observed on all tested electrodes with different *i*p and peak potential separation (Δ*E*P). After immobilization of the Ni-CoS on the surface of GCE, both *i*pa and *i*pc increased compared to *i*pa and *i*pc of the bare GCE.


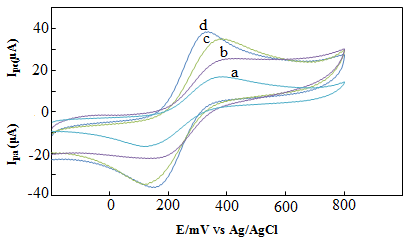


**Fig. 1S**. CVs obtained in 2 mM [Fe (CN) 6] 3-/4- in 1 M KCI; (a) GCE (b) Ni-CoS/GCE (c) GQDs/GCE and (d) Ni-CoS/GQDs/GCE.

This phenomenon can be related to the Ni-CoS particles offering a large surface and good conductivity. The GQDs acted as a suitable mediator to shuttle electron hence showed improved peaks currents when placed on the GCE. After incorporating the Ni-CoS and GQDs on GCE a synergistic process could be observed as shown by high *i*pa,, *i*pc and reduced Ep. The ∆Ep for a reversible system such as [Fe(CN) 6]3-/4- can be used as a good measure of the electron transfer ability of the electrode with lower values depicting a good electron transfer ability [38], with the following trend GCE< Ni-CoS/GCE< GQDs/GCE < Ni-CoS/GQDs/GCE. This confirmed the EIS results.
